# Supplementary figures and images for: Mycobacterium tuberculosis induces decelerated bioenergetic metabolism in human macrophages
Source: eLife journal article supplement (doi:10.7554/elife.39169), 2018-11-16

# THP-1

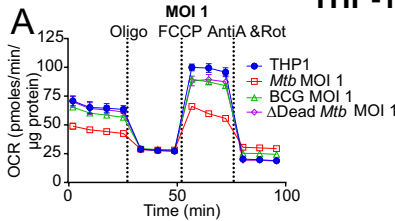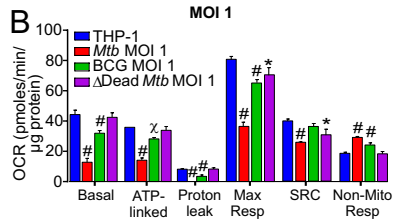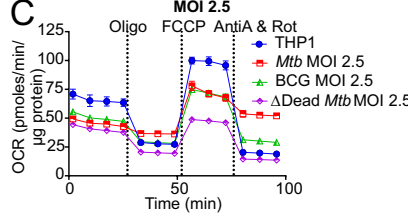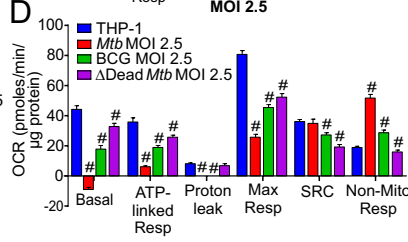

# hMDM

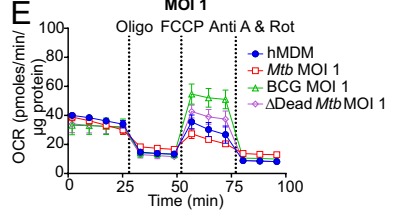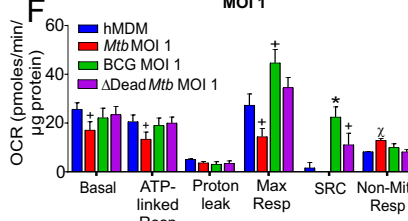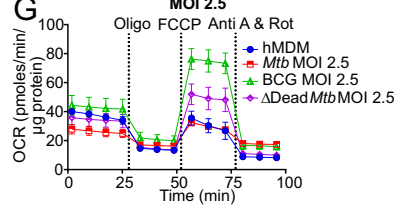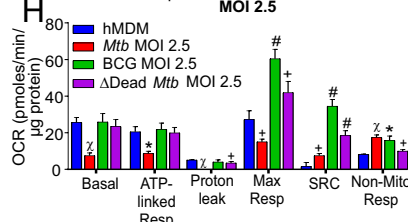

Supplement: supp [file elife-39169-supp-v1.zip]

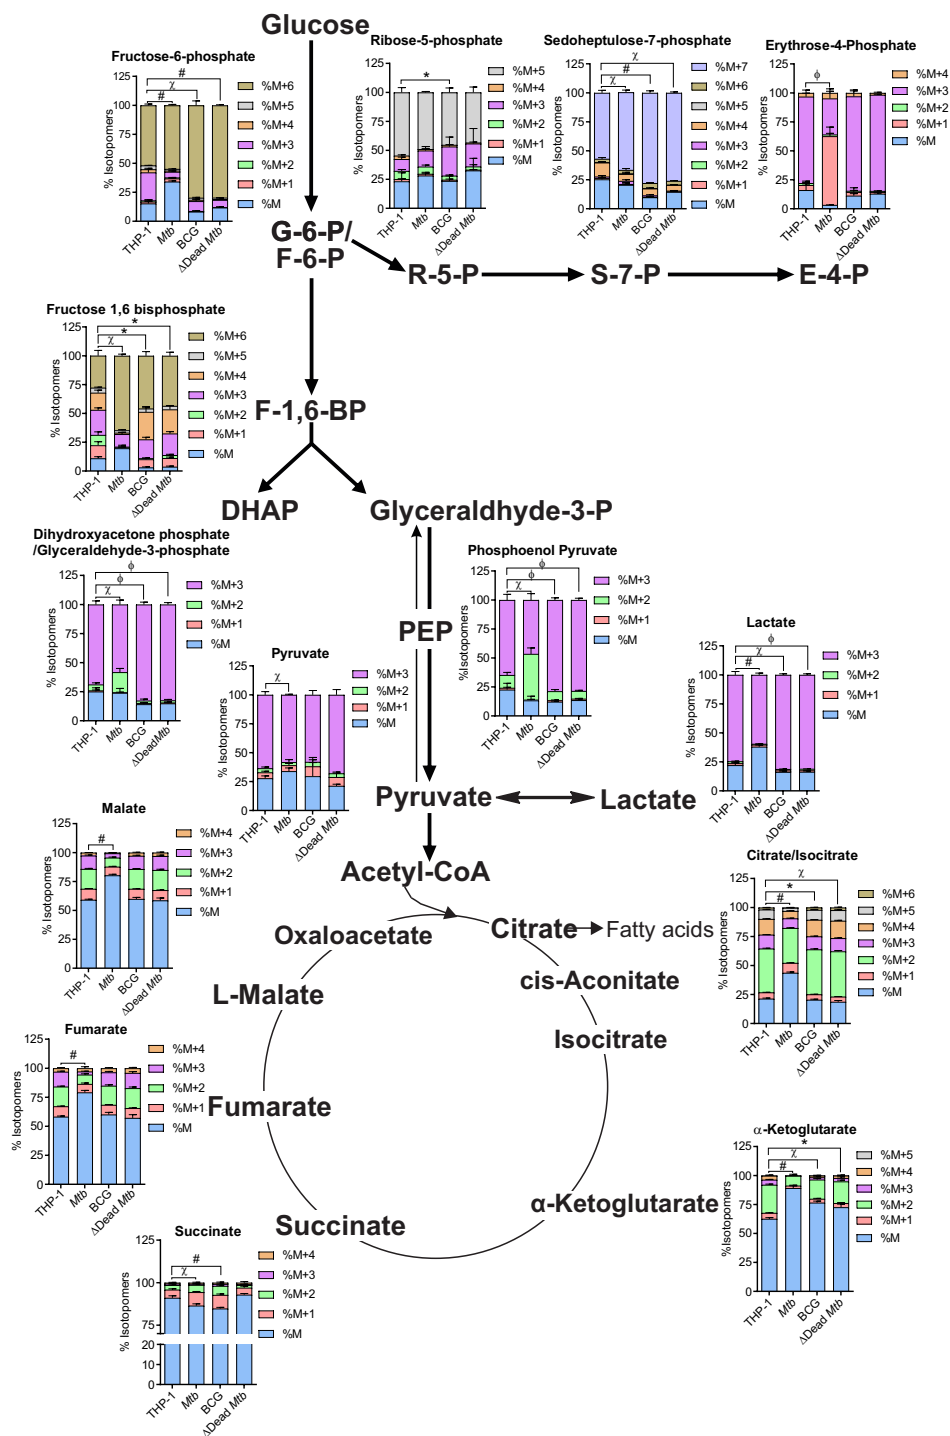

Supplement: supp [file elife-39169-supp-v1.zip]

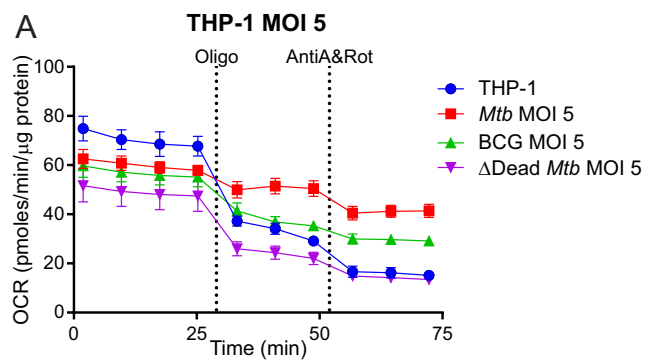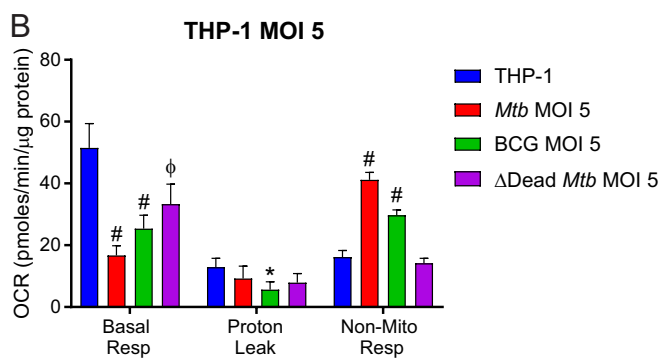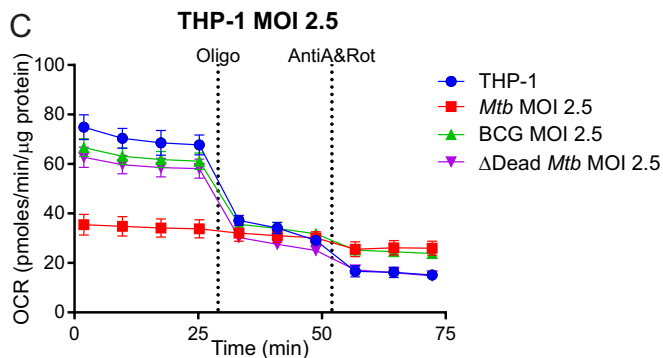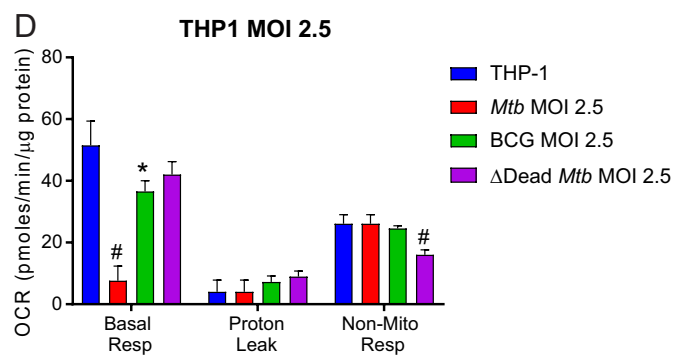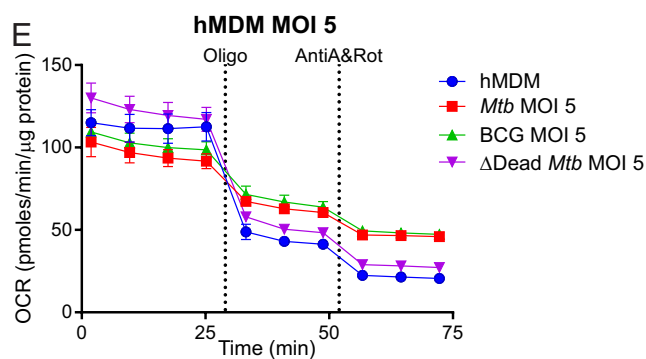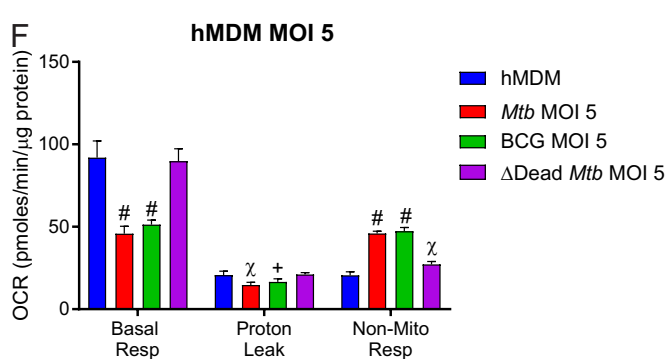

Supplement: supp [file elife-39169-supp-v1.zip]

THP-1

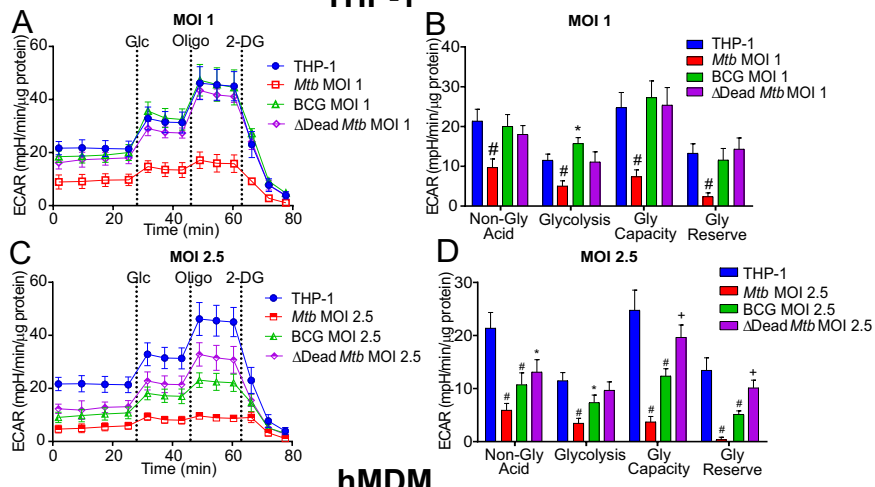

hMDM

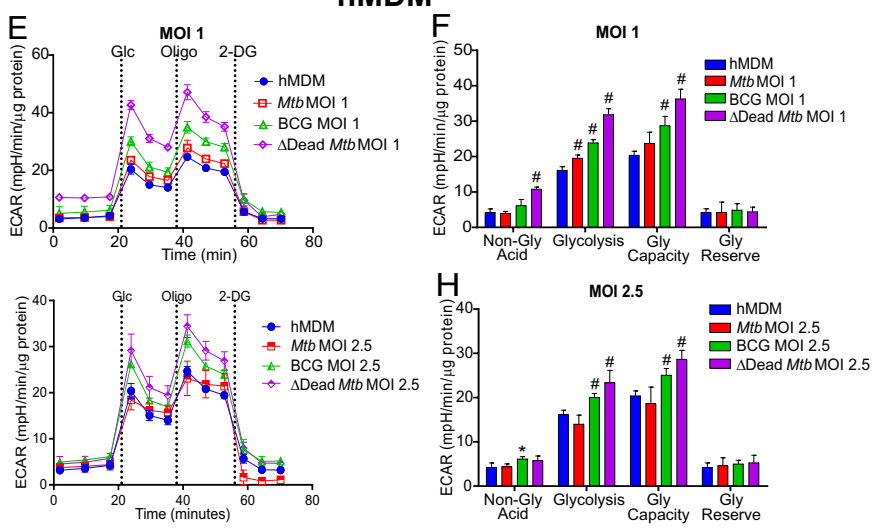

Supplement: supp [file elife-39169-supp-v1.zip]

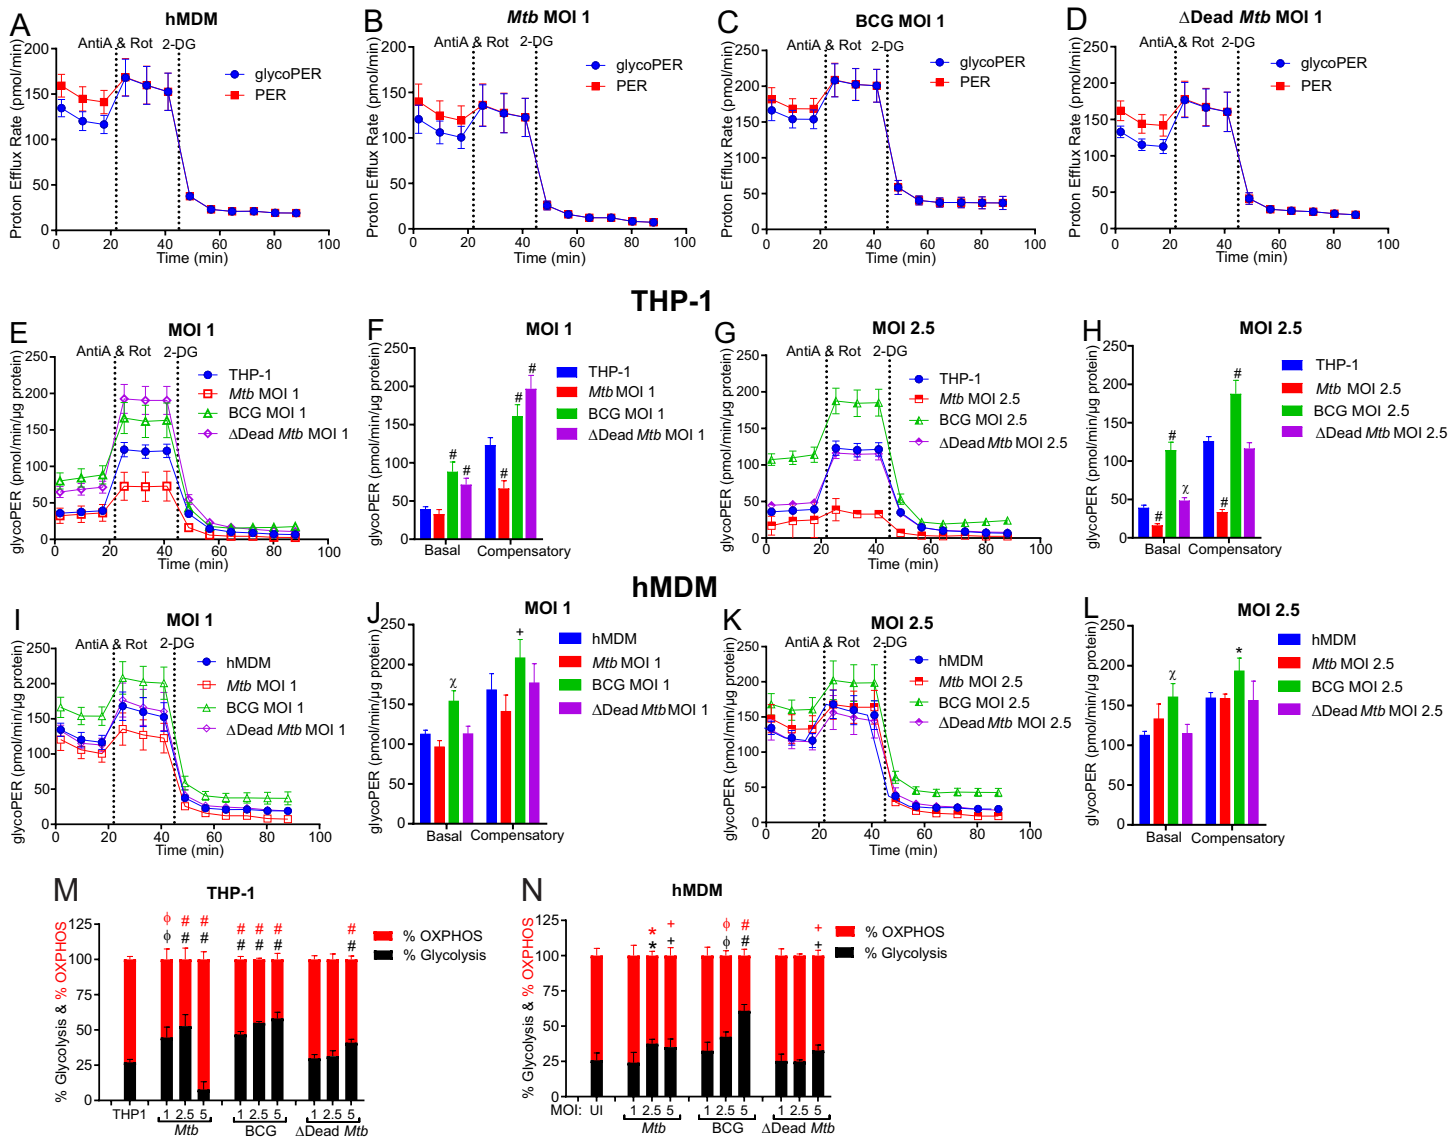

Supplement: supp [file elife-39169-supp-v1.zip]

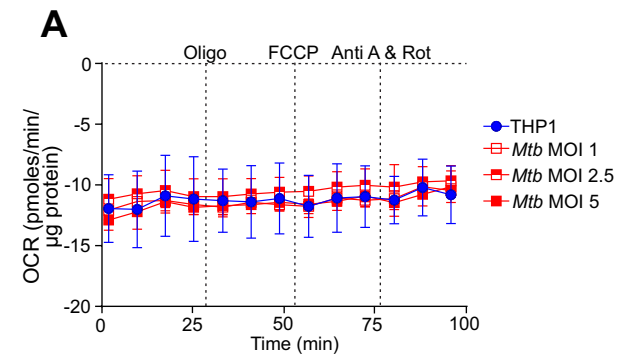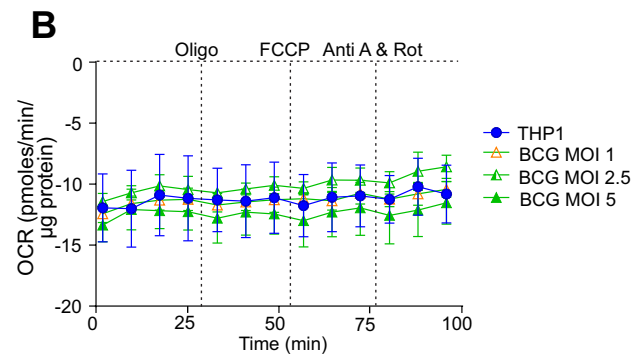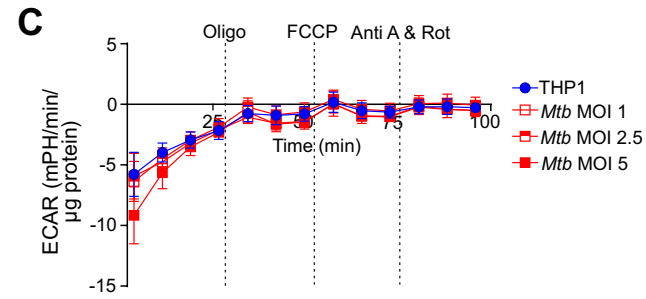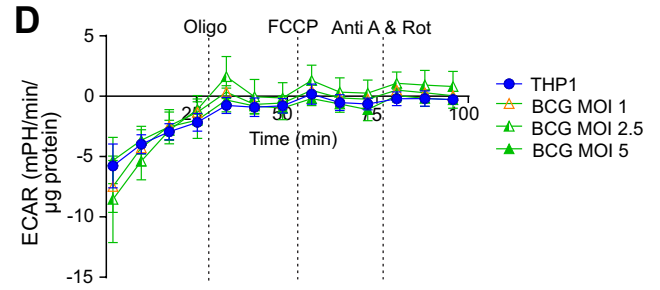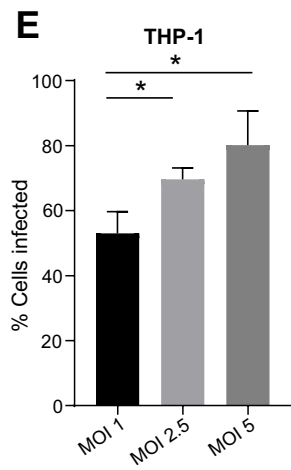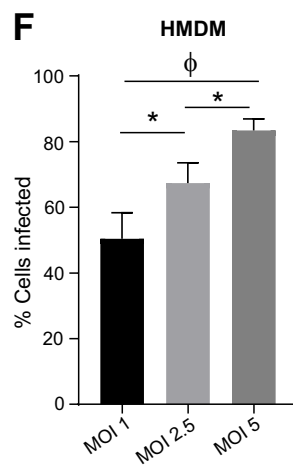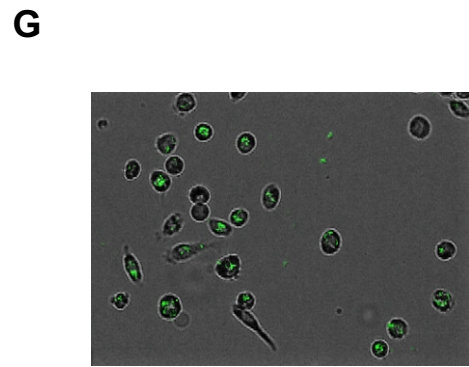

Supplement: supp [file elife-39169-supp-v1.zip]
